# Supplementary material for: Theoretical study on dry reforming of methane over a Ni(111) surface under electric fields and with alkali metal additives
Source: Royal Society of Chemistry journal article supplement (doi:10.1039/d3cy00547j), 2023-01-01
Supplement: d3cy00547j1.pdf [file d3cy00547j1.pdf]

*Supporting information*

Theoretical Study on Dry Reforming of Methane over a Ni(111) Surface  
under Electric Fields and with Alkali Metal Additives

Hui Jiao <sup>a</sup>, Gui-Chang Wang <sup>a,b,\*</sup>

(<sup>a</sup> Frontiers Science Center for New Organic Matter, Tianjin Key Lab and Molecule-Based Material Chemistry, College of Chemistry, Nankai University, Tianjin 300071, China; <sup>b</sup> Haihe Laboratory of Sustainable Chemical Transformation, Tianjin 300192, China)

\*corresponding author

Tel. +86-22-23502458.

E-mail: wangguichang@nankai.edu.cn.

**Table S1.** Calculation settings for each element in DRM reaction (PAW potential and valence  $Z_{\text{val}}$ ).

|    | potential               | $Z_{\text{val}}$ |
|----|-------------------------|------------------|
| Ni | PAW_PBE Ni_pv 06Sep2000 | 16               |
| C  | PAW_PBE C 08Apr2002     | 4                |
| H  | PAW_PBE H 15Jun2001     | 1                |
| O  | PAW_PBE O 08Apr2002     | 6                |
| Li | PAW_PBE Li 17Jan2003    | 1                |
| Na | PAW_PBE Na_pv 05Jan2001 | 7                |
| K  | PAW_PBE K_sv 06Sep2000  | 9                |
| Rb | PAW_PBE Rb_pv 06Sep2000 | 7                |
| Cs | PAW_PBE Cs_sv 08Apr2002 | 9                |

**Table S2.** The electronic adsorption energy ( $\Delta E_{\text{ads}}$ ) in eV and adsorption sites of species involved in DRM on Ni(111) under electric fields of 0,  $-0.6$ ,  $+0.6$  V/Å and K additive.

| Species            | Site   | Ni(111)                                                                                   |                            |                            | Site   | $\Delta E_{\text{ads}}(\text{eV})$<br>K/Ni(111) |
|--------------------|--------|-------------------------------------------------------------------------------------------|----------------------------|----------------------------|--------|-------------------------------------------------|
|                    |        | F=0.0 V/Å                                                                                 | F= $-0.6$ V/Å              | F= $+0.6$ V/Å              |        |                                                 |
| CH <sub>4</sub> *  |        | -0.11(0.00 <sup>a</sup> , -0.02 <sup>b</sup> , -0.12 <sup>d</sup> )                       | -0.10                      | -0.13                      |        | -0.18(-0.05 <sup>a</sup> )                      |
| CH <sub>3</sub> *  | Fcc    | -1.59(-1.89 <sup>a</sup> , -1.91 <sup>b</sup> , -1.81 <sup>c</sup> )                      | -1.46(-1.92 <sup>c</sup> ) | -1.65(-2.15 <sup>e</sup> ) | Top    | -1.46(-1.59 <sup>a</sup> )                      |
| CH <sub>2</sub> *  | Fcc    | -3.59(-4.03 <sup>a</sup> , -4.01 <sup>b</sup> , -3.85 <sup>c</sup> )                      | -3.60(-4.12 <sup>e</sup> ) | -3.61(-4.28 <sup>e</sup> ) | Fcc    | -3.53(-3.90 <sup>a</sup> )                      |
| CH*                | Fcc    | -5.96(-6.41 <sup>a</sup> , -6.43 <sup>b</sup> , -6.27 <sup>c</sup> )                      | -6.06(-6.47 <sup>e</sup> ) | -5.82(-6.56 <sup>e</sup> ) | Fcc    | -5.91(-6.38 <sup>a</sup> )                      |
| C*                 | Hcp    | -6.34(-6.89 <sup>a</sup> , -6.78 <sup>b</sup> , -6.61 <sup>c</sup> )                      | -6.23(-6.95 <sup>e</sup> ) | -6.17(-6.87 <sup>e</sup> ) | Hcp    | -6.55(-7.06 <sup>a</sup> )                      |
| H*                 | Fcc    | -2.71(-2.80 <sup>a</sup> , -2.81 <sup>b</sup> , -2.77 <sup>c</sup> , -2.89 <sup>f</sup> ) | -2.71                      | -2.69                      | Fcc    | -2.75(-2.81 <sup>a</sup> )                      |
| CO <sub>2</sub> *  |        | -0.16(-0.01 <sup>a</sup> , -0.02 <sup>b</sup> , -0.20 <sup>d</sup> )                      | -0.16                      | -0.17                      |        | -0.40(-0.29 <sup>a</sup> )                      |
| CO*                | Hcp    | -1.59(-1.93 <sup>a</sup> , -1.92 <sup>b</sup> , -1.45 <sup>d</sup> , -1.26 <sup>f</sup> ) | -1.73                      | -1.46                      | Hcp    | -2.10(-2.35 <sup>a</sup> )                      |
| O*                 | Fcc    | -5.32(-5.39 <sup>a</sup> , -5.67 <sup>b</sup> , -5.47 <sup>d</sup> , -5.13 <sup>f</sup> ) | -5.26                      | -4.91                      | Fcc    | -5.60(-5.65 <sup>a</sup> )                      |
| COOH*              | Bridge | -2.05(-2.25 <sup>a</sup> , -2.26 <sup>b</sup> , -2.14 <sup>d</sup> )                      | -2.22                      | -1.79                      | Top    | -2.69(-2.73 <sup>a</sup> )                      |
| CHO*               | Fcc    | -2.03(-2.27 <sup>a</sup> , -2.26 <sup>b</sup> , -2.24 <sup>d</sup> )                      | -1.86                      | -1.86                      | Fcc    | -2.34(-2.49 <sup>a</sup> )                      |
| CH <sub>2</sub> O* | Fcc    | -0.54(-0.75 <sup>b</sup> , -0.55 <sup>d</sup> )                                           | -0.27                      | -0.38                      | Fcc    | -0.68                                           |
| OH*                | Fcc    | -3.19(-3.27 <sup>a</sup> , -3.42 <sup>b</sup> , -3.46 <sup>d</sup> )                      | -2.72                      | -2.98                      | Bridge | -3.29(-3.24 <sup>a</sup> )                      |
| H <sub>2</sub> O*  | Top    | -0.23(-0.27 <sup>a</sup> , -0.29 <sup>b</sup> , -0.48 <sup>d</sup> )                      | -0.12                      | -0.23                      | Top    | -0.65(-0.68 <sup>a</sup> )                      |
| H <sub>2</sub> *   | Top    | 0.05(-0.25 <sup>a</sup> , -0.22 <sup>b</sup> , -0.38 <sup>d</sup> )                       | 0.14                       | -0.01                      | Top    | 0.22(-0.06 <sup>a</sup> )                       |

<sup>a</sup> From ref. 1. <sup>b</sup> From ref. 2. <sup>c</sup> From ref. 3. <sup>d</sup> From ref. 4. <sup>e</sup> From ref. 5. <sup>f</sup> From ref. 6.

**Table S3.** Electron transfer ( $|e|$ ) of species involved in DRM on Ni(111) under electric fields of 0,  $-0.6$ ,  $+0.6$  V/Å and K additive.

| Species            | F=0.0 V/Å | F= $-0.6$ V/Å | F= $+0.6$ V/Å | K/Ni(111) |
|--------------------|-----------|---------------|---------------|-----------|
| CH <sub>3</sub> *  | -0.32     | -0.37         | -0.27         | -0.46     |
| CH <sub>2</sub> *  | -0.39     | -0.46         | -0.33         | -0.55     |
| CH*                | -0.42     | -0.47         | -0.38         | -0.58     |
| C*                 | -0.56     | -0.60         | -0.52         | -0.71     |
| H*                 | -0.26     | -0.27         | -0.24         | -0.31     |
| CO <sub>2</sub> *  | -0.51     | -0.60         | -0.29         | -0.86     |
| CO*                | -0.40     | -0.46         | -0.33         | -0.61     |
| O*                 | -0.89     | -0.92         | -0.85         | -1.00     |
| COOH*              | -0.34     | -0.42         | -0.27         | -0.51     |
| CHO*               | -0.45     | -0.53         | -0.38         | -0.70     |
| CH <sub>2</sub> O* | -0.50     | -0.57         | -0.42         | -0.77     |
| OH*                | -0.55     | -0.59         | -0.52         | -0.64     |

**Table S4.** The activation energy ( $\Delta E_a$ ) and reaction energy ( $\Delta E$ ) in eV of all elementary reactions involved in DRM on Ni(111) under electric fields of 0,  $-0.6$ ,  $+0.6$  V/Å and K additive.

| Reaction                                  | Ni (111)             |                       |                      |                       |                      |                       | K/Ni (111)            |                       |
|-------------------------------------------|----------------------|-----------------------|----------------------|-----------------------|----------------------|-----------------------|-----------------------|-----------------------|
|                                           | F=0.0 V/Å            |                       | F= $-0.6$ V/Å        |                       | F= $+0.6$ V/Å        |                       | $\Delta E_a$          | $\Delta E$            |
|                                           | $\Delta E_a$         | $\Delta E$            | $\Delta E_a$         | $\Delta E$            | $\Delta E_a$         | $\Delta E$            |                       |                       |
| CH <sub>4(g)</sub> → CH <sub>3</sub> *+H* | 0.98                 | 0.30                  | 1.10                 | 0.42                  | 0.89                 | 0.23                  | 1.11                  | 0.4                   |
|                                           | (0.71 <sup>a</sup> ) | (-0.11 <sup>a</sup> ) | (0.87 <sup>a</sup> ) | (0.09 <sup>a</sup> )  | (0.62 <sup>a</sup> ) | (-0.16 <sup>a</sup> ) |                       | (0.32 <sup>c</sup> )  |
|                                           | (0.91 <sup>b</sup> ) | (0.01 <sup>b</sup> )  |                      |                       |                      |                       |                       |                       |
| CH <sub>3</sub> * → CH <sub>2</sub> *+H*  | 0.66                 | 0.10                  | 0.66                 | 0.05                  | 0.68                 | 0.12                  | 0.73                  | 0.05                  |
|                                           | (0.55 <sup>a</sup> ) | (-0.01 <sup>a</sup> ) | (0.52 <sup>a</sup> ) | (-0.06 <sup>a</sup> ) | (0.56 <sup>a</sup> ) | (0.06 <sup>a</sup> )  |                       | (-0.16 <sup>c</sup> ) |
|                                           | (0.70 <sup>b</sup> ) | (0.07 <sup>b</sup> )  |                      |                       |                      |                       |                       |                       |
| CH <sub>2</sub> * → CH*+H*                | 0.32                 | -0.32                 | 0.31                 | -0.34                 | 0.34                 | -0.27                 | 0.27                  | -0.36                 |
|                                           | (0.25 <sup>a</sup> ) | (-0.41 <sup>a</sup> ) | (0.23 <sup>a</sup> ) | (-0.46 <sup>a</sup> ) | (0.27 <sup>a</sup> ) | (-0.34 <sup>a</sup> ) |                       | (-0.48 <sup>c</sup> ) |
|                                           | (0.35 <sup>b</sup> ) | (-0.34 <sup>b</sup> ) |                      |                       |                      |                       |                       |                       |
| CH* → C*+H*                               | 1.37                 | 0.60                  | 1.30                 | 0.52                  | 1.44                 | 0.70                  | 1.10                  | 0.44                  |
|                                           | (1.23 <sup>a</sup> ) | (0.45 <sup>a</sup> )  | (1.14 <sup>a</sup> ) | (0.34 <sup>a</sup> )  | (1.37 <sup>a</sup> ) | (0.63 <sup>a</sup> )  |                       | (0.32 <sup>c</sup> )  |
|                                           | (1.33 <sup>b</sup> ) | (0.52 <sup>b</sup> )  |                      |                       |                      |                       |                       |                       |
| CO <sub>2(g)</sub> → CO*+O*               | 0.69                 | -0.72                 | 0.55                 | -0.87                 | 0.88                 | -0.55                 | 0.06                  | -1.29                 |
|                                           | (0.67 <sup>b</sup> ) | (-0.98 <sup>b</sup> ) |                      |                       |                      |                       | (-0.08 <sup>c</sup> ) | (-0.79 <sup>c</sup> ) |
|                                           |                      |                       |                      |                       |                      |                       |                       |                       |
| CO <sub>2(g)</sub> +H* → COOH*            | 1.17                 | 0.35                  | 1.02                 | 0.29                  | 1.32                 | 0.38                  | 0.32                  | -0.22                 |
|                                           | (1.13 <sup>b</sup> ) | (0.28 <sup>b</sup> )  |                      |                       |                      |                       | (0.22 <sup>c</sup> )  | (-0.22 <sup>c</sup> ) |
|                                           |                      |                       |                      |                       |                      |                       |                       |                       |
| COOH* → CO*+OH*                           | 0.36                 | -1.04                 | 0.53                 | -0.97                 | 0.33                 | -1.07                 | 0.45                  | -0.53                 |
|                                           | (0.57 <sup>b</sup> ) | (-1.08 <sup>b</sup> ) |                      |                       |                      |                       | (0.40 <sup>c</sup> )  | (-0.89 <sup>c</sup> ) |
|                                           |                      |                       |                      |                       |                      |                       |                       |                       |

|                                   |                                                      |                                                         |                              |                                |                              |                                |                              |                                |
|-----------------------------------|------------------------------------------------------|---------------------------------------------------------|------------------------------|--------------------------------|------------------------------|--------------------------------|------------------------------|--------------------------------|
| $C^*+O^* \rightarrow CO^*$        | 2.07<br>(2.17 <sup>a</sup> )<br>(1.59 <sup>b</sup> ) | -1.61<br>(-1.48 <sup>a</sup> )<br>(-1.35 <sup>b</sup> ) | 2.05<br>(2.12 <sup>a</sup> ) | -1.65<br>(-1.56 <sup>a</sup> ) | 2.09<br>(2.19 <sup>a</sup> ) | -1.59<br>(-1.49 <sup>a</sup> ) | 1.08<br>(1.55 <sup>c</sup> ) | -1.87<br>(-1.30 <sup>c</sup> ) |
| $CH^*+O^* \rightarrow CHO^*$      | 1.19<br>(1.14 <sup>a</sup> )<br>(1.53 <sup>b</sup> ) | 0.13<br>(0.55 <sup>a</sup> )<br>(0.45 <sup>b</sup> )    | 1.19<br>(1.15 <sup>a</sup> ) | 0.12<br>(0.11 <sup>a</sup> )   | 1.18<br>(1.13 <sup>a</sup> ) | 0.11<br>(0.06 <sup>a</sup> )   | 1.19<br>(1.52 <sup>c</sup> ) | 0.09<br>(0.51 <sup>c</sup> )   |
| $CHO^* \rightarrow CO^*+H^*$      | 0.19<br>(0.13 <sup>a</sup> )<br>(0.20 <sup>b</sup> ) | -1.21<br>(-1.33 <sup>a</sup> )<br>(-1.28 <sup>b</sup> ) | 0.16<br>(0.08 <sup>a</sup> ) | -1.33<br>(-1.53 <sup>a</sup> ) | 0.22<br>(0.20 <sup>a</sup> ) | -1.08<br>(-1.11 <sup>a</sup> ) | 0.07<br>(0.05 <sup>c</sup> ) | -1.39<br>(-1.49 <sup>c</sup> ) |
| $CH_2^*+O^* \rightarrow CH_2O^*$  | 1.19<br>(1.13 <sup>a</sup> )<br>(1.45 <sup>b</sup> ) | 0.19<br>(0.39 <sup>a</sup> )<br>(0.50 <sup>b</sup> )    | 1.21<br>(1.17 <sup>a</sup> ) | 0.11<br>(0.33 <sup>a</sup> )   | 1.16<br>(1.49 <sup>a</sup> ) | 0.16<br>(0.36 <sup>a</sup> )   | 1.21                         | 0.22                           |
| $CH_2O^* \rightarrow CHO^*+H^*$   | 0.36<br>(0.18 <sup>a</sup> )<br>(0.36 <sup>b</sup> ) | -0.26<br>(-0.55 <sup>a</sup> )<br>(-0.38 <sup>b</sup> ) | 0.32<br>(0.17 <sup>a</sup> ) | -0.32<br>(-0.54 <sup>a</sup> ) | 0.41<br>(0.25 <sup>a</sup> ) | -0.22<br>(-0.45 <sup>a</sup> ) | 0.23                         | -0.41                          |
| $O^*+H^* \rightarrow OH^*$        | 1.23<br>(1.24 <sup>a</sup> )<br>(1.35 <sup>b</sup> ) | 0.09<br>(0.27 <sup>a</sup> )<br>(0.19 <sup>b</sup> )    | 1.26<br>(1.30 <sup>a</sup> ) | 0.28<br>(0.58 <sup>a</sup> )   | 1.19<br>(1.18 <sup>a</sup> ) | -0.11<br>(-0.07 <sup>a</sup> ) | 1.11<br>(1.21 <sup>c</sup> ) | 0.29<br>(0.50 <sup>c</sup> )   |
| $OH^*+H^* \rightarrow H_2O_{(g)}$ | 1.10<br>(1.11 <sup>a</sup> )<br>(1.33 <sup>b</sup> ) | 0.45<br>(0.42 <sup>a</sup> )<br>(0.70 <sup>b</sup> )    | 1.00<br>(0.81 <sup>a</sup> ) | 0.11<br>(0.07 <sup>a</sup> )   | 1.25<br>(1.32 <sup>a</sup> ) | 0.38<br>(0.30 <sup>a</sup> )   | 0.69<br>(0.80 <sup>c</sup> ) | 0.49<br>(0.67 <sup>c</sup> )   |
| $H^*+H^* \rightarrow H_{2(g)}$    | 0.81<br>(0.88 <sup>a</sup> )<br>(0.92 <sup>b</sup> ) | 0.66<br>(0.87 <sup>a</sup> )<br>(1.08 <sup>b</sup> )    | 0.85<br>(0.96 <sup>a</sup> ) | 0.66<br>(0.98 <sup>a</sup> )   | 0.76<br>(0.78 <sup>a</sup> ) | 0.63<br>(0.72 <sup>a</sup> )   | 0.87                         | 0.58                           |
| $2CO^* \rightarrow CO_{2(g)}+C^*$ | 1.80<br>(1.59 <sup>c</sup> )                         | 0.53<br>(0.36 <sup>c</sup> )                            | 1.62                         | 0.55                           | 1.9                          | 0.51                           | 0.86<br>(0.87 <sup>c</sup> ) | 0.58<br>(0.64 <sup>c</sup> )   |
| $C^*$ , diffusion                 | 0.33<br>(0.66 <sup>d</sup> )                         | -0.03                                                   | 0.32                         | -0.04                          | 0.32                         | -0.05                          | 0.33                         | -0.04                          |
| $2C^* \rightarrow C-C^*$          | 0.66<br>(0.70 <sup>d</sup> )                         | -0.94<br>(-0.89 <sup>d</sup> )                          | 0.63                         | -0.96                          | 0.63                         | -0.97                          | 0.61                         | -0.90                          |

Note: Zero-point energy (ZPE) correction is included. <sup>a</sup> From ref. 7. <sup>b</sup> From ref. 2. <sup>c</sup> From ref. 1. <sup>d</sup> From ref. 8.

**Table S5.** The Bader charge of Ni(111) surface with alkali metals.

| Atom            | Li     | Na     | K      | Rb     | Cs     |
|-----------------|--------|--------|--------|--------|--------|
| AM              | 0.926  | 0.770  | 0.779  | 0.780  | 0.757  |
| Ni (Near to AM) | -0.277 | -0.178 | -0.146 | -0.142 | -0.124 |
| Ni (other)      | -0.055 | -0.065 | -0.081 | -0.081 | -0.085 |

**Table S6.** The activation energy ( $\Delta E_a$ ) and reaction energy ( $\Delta E$ ) in eV of important reactions involved in DRM on Ni(111) with AMs additives. (Zero point energy (ZPE), thermal and entropic contributions were not included.)

| Reaction Surfaces | $\text{CH}_{4(g)} \rightarrow \text{CH}_3^* + \text{H}^*$ |            | $\text{CH}^* \rightarrow \text{C}^* + \text{H}^*$ |            | $\text{CO}_{2(g)} \rightarrow \text{CO}^* + \text{O}^*$ |            |
|-------------------|-----------------------------------------------------------|------------|---------------------------------------------------|------------|---------------------------------------------------------|------------|
|                   | $\Delta E_a$                                              | $\Delta E$ | $\Delta E_a$                                      | $\Delta E$ | $\Delta E_a$                                            | $\Delta E$ |
| Ni(111)           | 1.12                                                      | 0.44       | 1.37                                              | 0.60       | 0.77                                                    | -0.68      |
| Li/Ni(111)        | 1.26                                                      | 0.63       | 1.09                                              | 0.42       | 0.38                                                    | -1.03      |
| Na/Ni(111)        | 1.28                                                      | 0.61       | 1.28                                              | 0.59       | 0.37                                                    | -0.96      |
| K/Ni(111)         | 1.27                                                      | 0.52       | 1.25                                              | 0.52       | 0.07                                                    | -1.23      |
| Rb/Ni(111)        | 1.26                                                      | 0.51       | 1.26                                              | 0.51       | 0.04                                                    | -1.12      |
| Cs/Ni(111)        | 1.24                                                      | 0.64       | 1.29                                              | 0.51       | 0.02                                                    | -1.21      |

**Table S7.** The rates of all elementary reactions involved in DRM on Ni(111) under electric fields of 0, -0.6, +0.6 V/Å and K additive at 1073.15K and 1 bar.

| Reaction                                                       | Ni (111)   |             |             | K/Ni (111) |
|----------------------------------------------------------------|------------|-------------|-------------|------------|
|                                                                | F= 0.0 V/Å | F= -0.6 V/Å | F= +0.6 V/Å |            |
| $\text{CH}_4^* \rightarrow \text{CH}_3^* + \text{H}^*$         | 1.19E-02   | 3.46E-03    | 2.69E-02    | 3.12E-03   |
| $\text{CH}_3^* \rightarrow \text{CH}_2^* + \text{H}^*$         | 9.47E-01   | 4.39E-03    | 6.37E+00    | 3.13E-03   |
| $\text{CH}_2^* \rightarrow \text{CH}^* + \text{H}^*$           | 3.83E+03   | 1.15E+01    | 3.09E+04    | 5.71E-01   |
| $\text{CH}^* \rightarrow \text{C}^* + \text{H}^*$              | 4.15E+02   | 5.23E+00    | 4.15E+02    | 1.49E+00   |
| $\text{CO}_2^* \rightarrow \text{CO}^* + \text{O}^*$           | 9.81E-03   | 4.77E-02    | 1.01E-02    | 1.95E+01   |
| $\text{CO}_2^* + \text{H}^* \rightarrow \text{COOH}^*$         | 1.83E-07   | 5.30E-07    | 1.83E-08    | 4.07E-03   |
| $\text{COOH}^* \rightarrow \text{CO}^* + \text{OH}^*$          | 4.50E-07   | 1.69E-06    | 7.08E-08    | 2.78E-02   |
| $\text{C}^* + \text{O}^* \rightarrow \text{CO}^*$              | 3.50E-07   | 6.91E-07    | 1.27E-07    | 3.53E-03   |
| $\text{CH}^* + \text{O}^* \rightarrow \text{CHO}^*$            | 9.23E-03   | 3.46E-03    | 1.01E-02    | 2.97E-04   |
| $\text{CHO}^* \rightarrow \text{CO}^* + \text{H}^*$            | 2.34E-01   | 1.12E-01    | 1.71E-01    | 1.16E+01   |
| $\text{CH}_2^* + \text{O}^* \rightarrow \text{CH}_2\text{O}^*$ | 1.03E-06   | 1.44E-07    | 1.44E-06    | 1.15E-08   |
| $\text{CH}_2\text{O}^* \rightarrow \text{CHO}^* + \text{H}^*$  | 7.86E-06   | 1.36E-06    | 6.12E-06    | 6.66E-05   |
| $\text{O}^* + \text{H}^* \rightarrow \text{OH}^*$              | 1.70E-01   | 4.35E+00    | 1.54E-02    | 7.38E+01   |
| $\text{OH}^* + \text{H}^* \rightarrow \text{H}_2\text{O}^*$    | 8.56E-04   | 6.77E-03    | 5.67E-05    | 8.33E-01   |
| $\text{H}^* + \text{H}^* \rightarrow \text{H}_2^*$             | 1.64E+04   | 3.55E+03    | 1.23E+04    | 4.57E+03   |
| $2\text{CO}^* \rightarrow \text{CO}_2^* + \text{C}^*$          | 8.31E-13   | 1.47E-11    | 1.86E-13    | 1.73E-06   |
| $\text{C}^*$ , diffusion                                       | 7.43E+02   | 6.09E-01    | 2.29E+04    | 1.73E-03   |
| $2\text{C}^* \rightarrow \text{C}-\text{C}^*$                  | 2.95E+01   | 3.69E-02    | 1.25E+03    | 1.32E-04   |

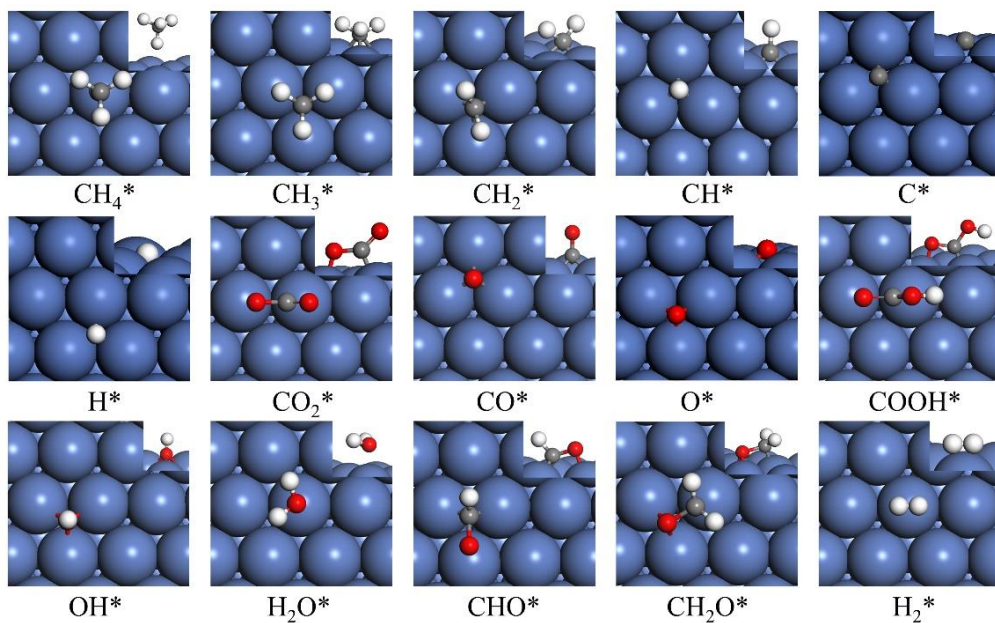

**Figure S1.** The top and side views of the most stable configurations of the DRM intermediates on Ni(111) surface. Blue, grey, red, and white represent Ni, C, O, and H, respectively.

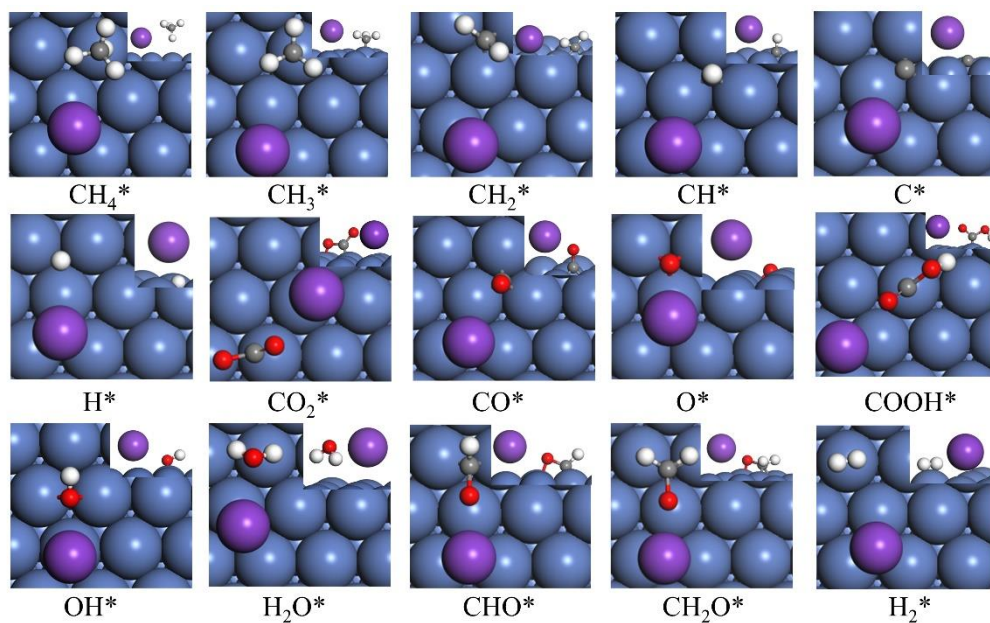

**Figure S2.** The top and side views of the most stable configurations of the DRM intermediates on K/Ni(111) surface. Blue, purple, grey, red, and white represents Ni, K, C, O, and H, respectively.

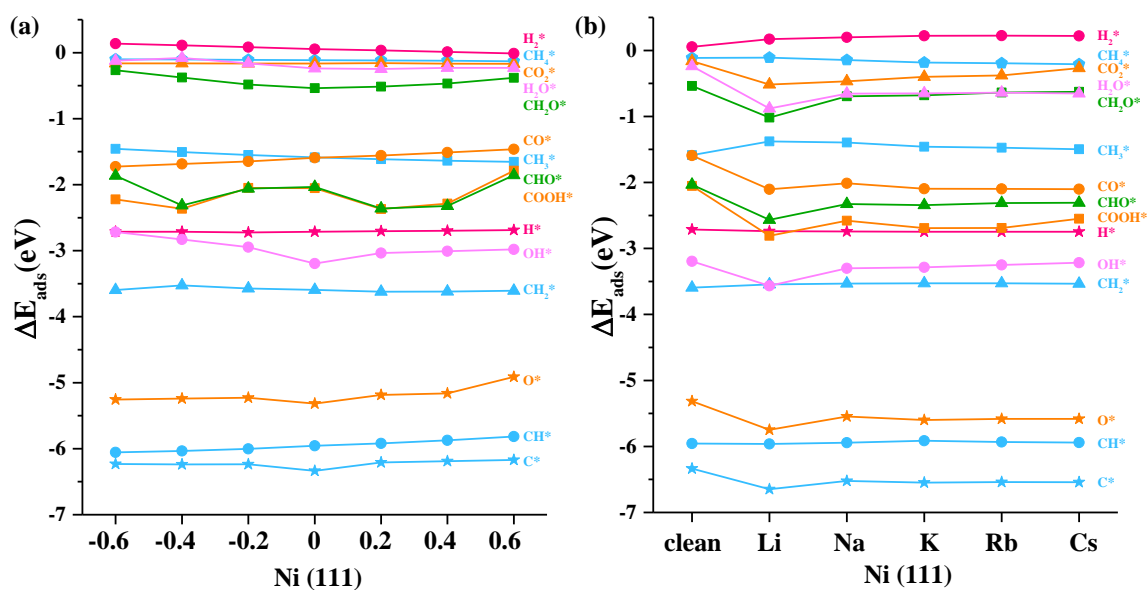

**Figure S3.** The electronic adsorption energy ( $\Delta E_{ads}$ ) of species involved in DRM on Ni(111) under (a) electric fields from  $-0.6$  to  $+0.6$  V/Å and (b) alkali metals.

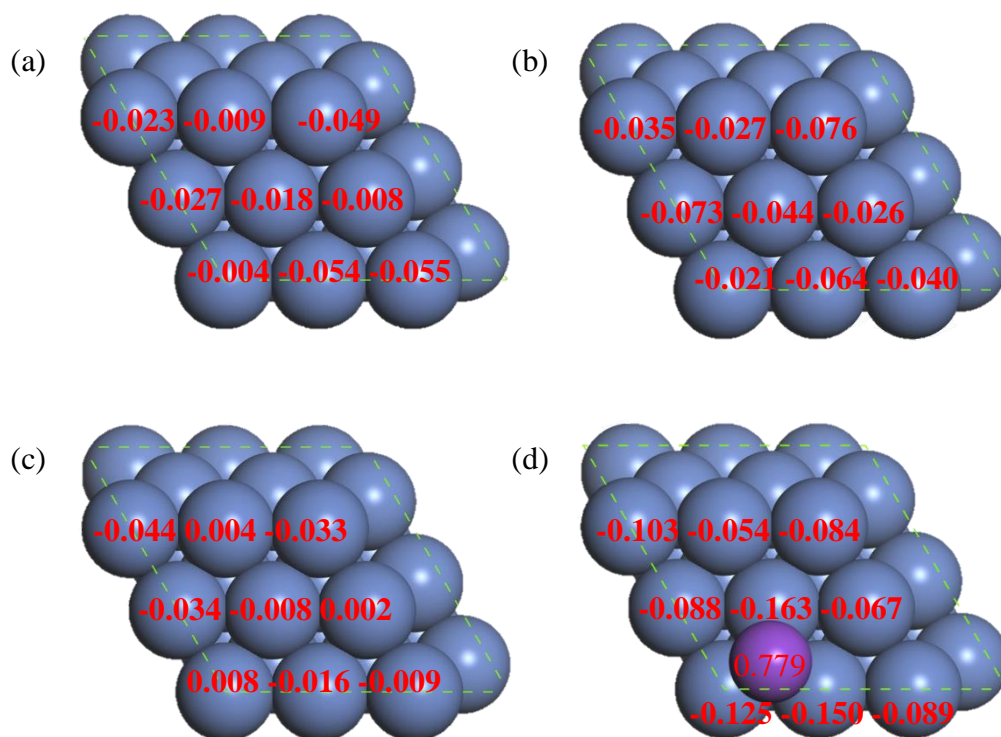

**Figure S4.** The Bader charge of Ni(111) under electric fields of (a) 0, (b)  $-0.6$ , (c)  $+0.6$  V/Å and (d) K additive.



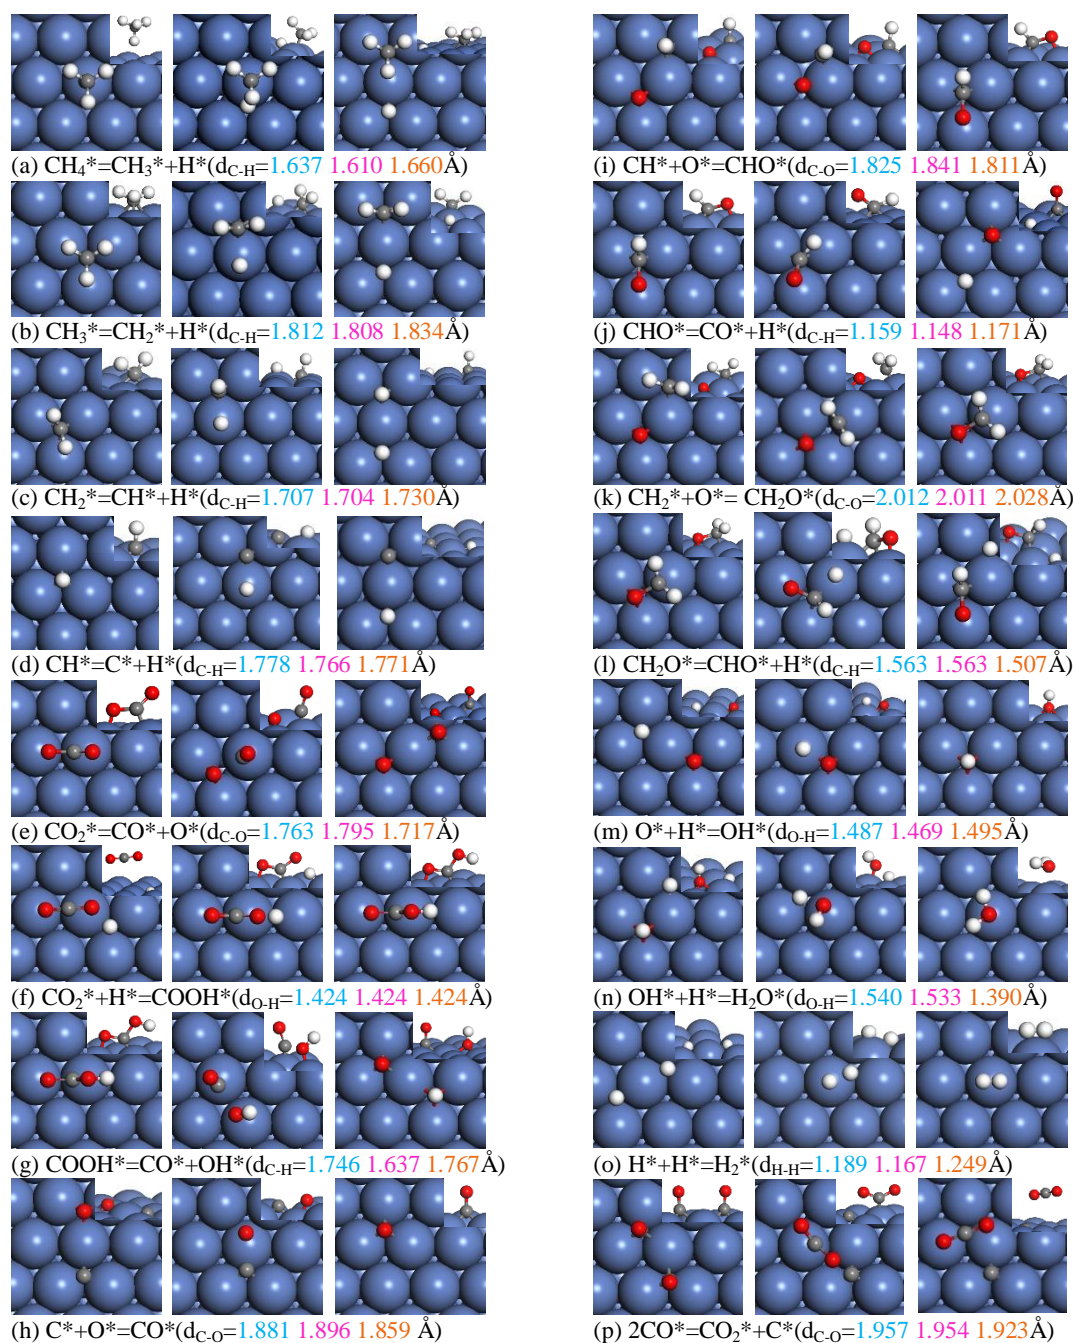

**Figure S5.** The top and side views of IS, TS, and FS of elementary reaction involved in DRM reaction on Ni (111) surface. The distance between the bonding or breaking atoms in the transition state structure is expressed in parentheses, where blue, purple and orange indicate electric fields of 0,  $-0.6$ , and  $+0.6 \text{ V/\AA}$ , respectively.



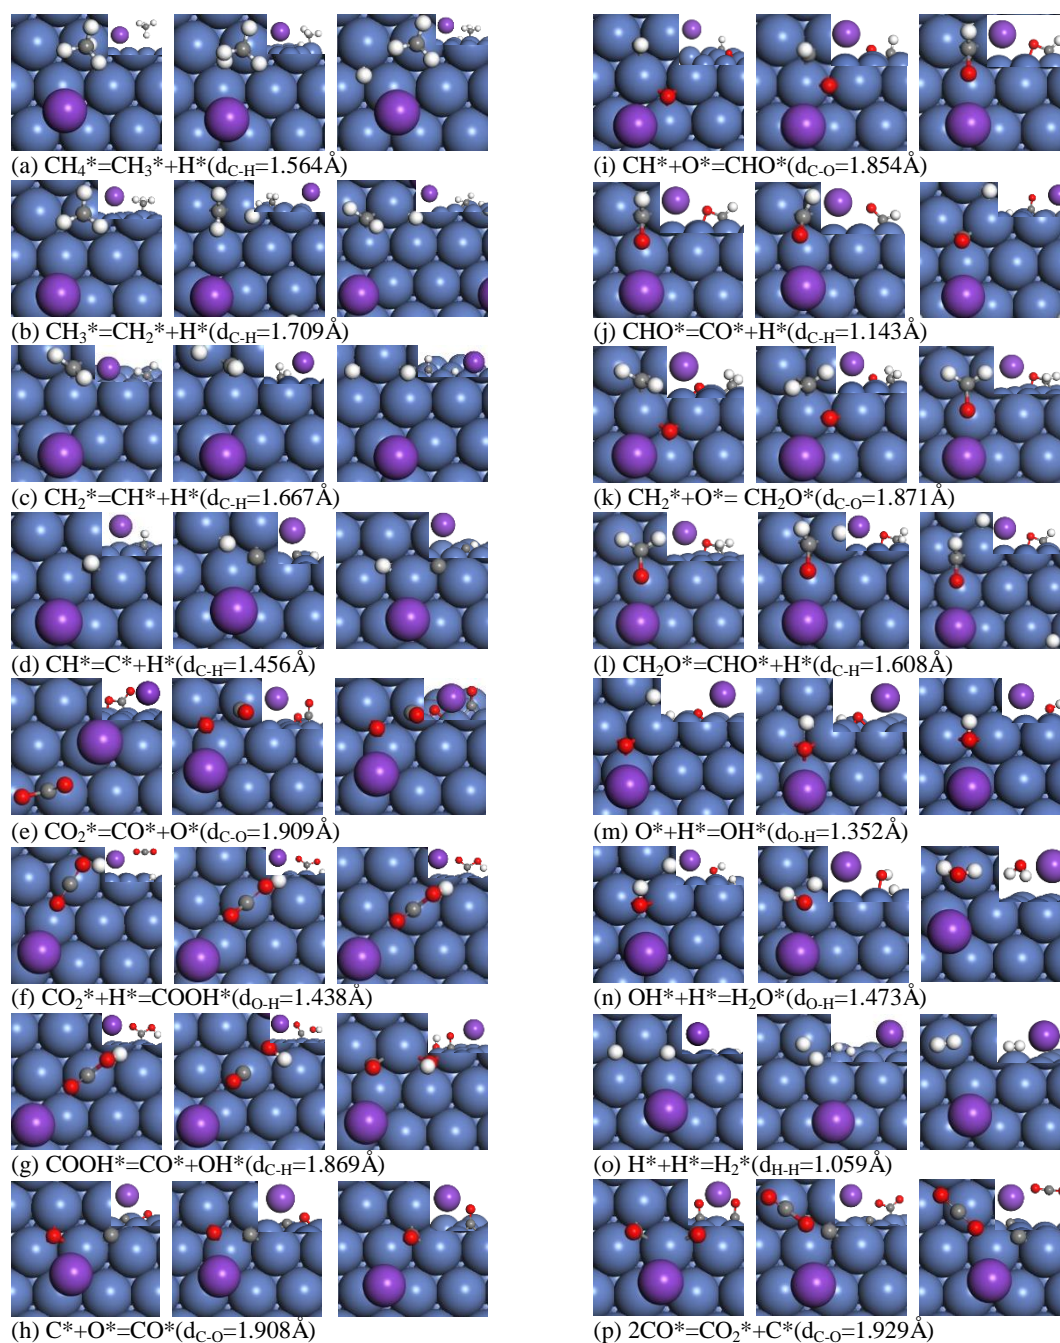

**Figure S6.** The top and side views of IS, TS, and FS of elementary reaction involved in DRM reaction on K/Ni (111) surface. The distance between the bonding or breaking atoms in the transition state structure is expressed in parentheses.

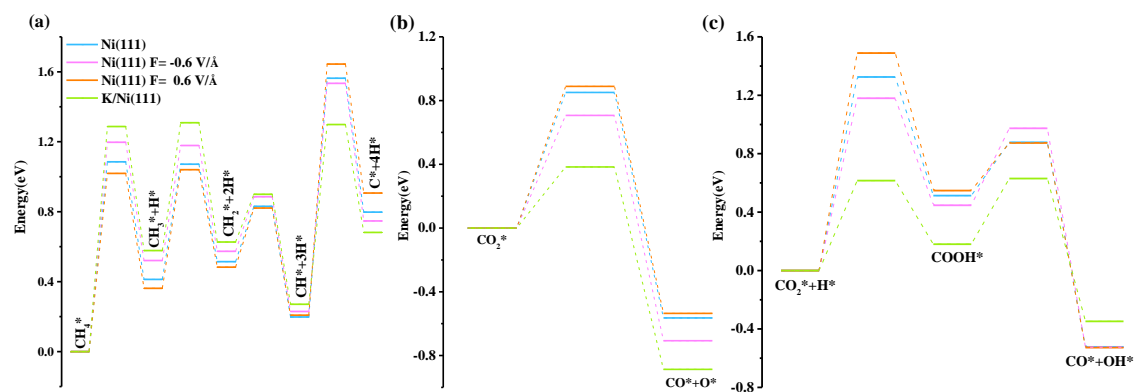

**Figure S7.** Electronic energy profiles of (a) CH<sub>4</sub> dissociation, (b) CO<sub>2</sub> direct dissociation, (c) CO<sub>2</sub> dissociation by H assistance on Ni(111) under electric fields of 0, -0.6, +0.6 V/Å and K additive.

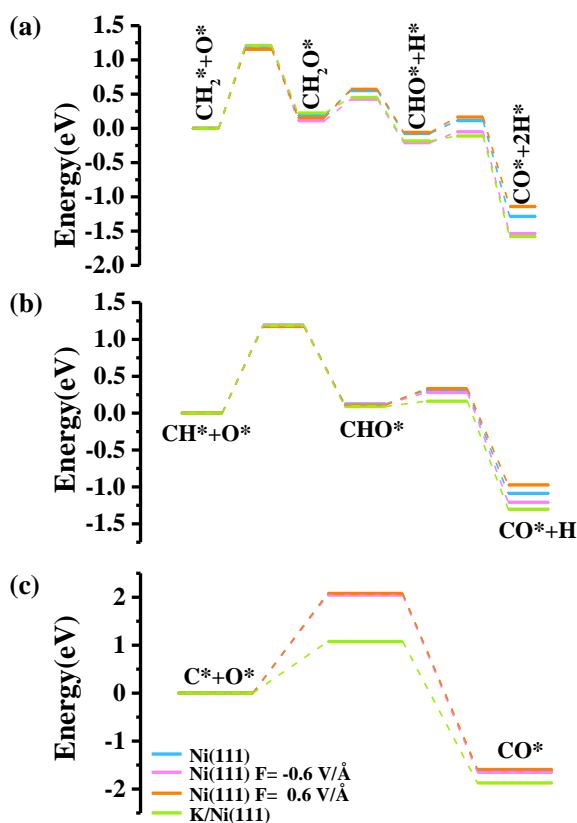

**Figure S8.** Potential energy profiles of (a) CH<sub>2</sub>-O oxidation, (b) CH-O oxidation, and (c) C-O oxidation on Ni(111) under electric fields of 0, -0.6, +0.6 V/Å and K additive.

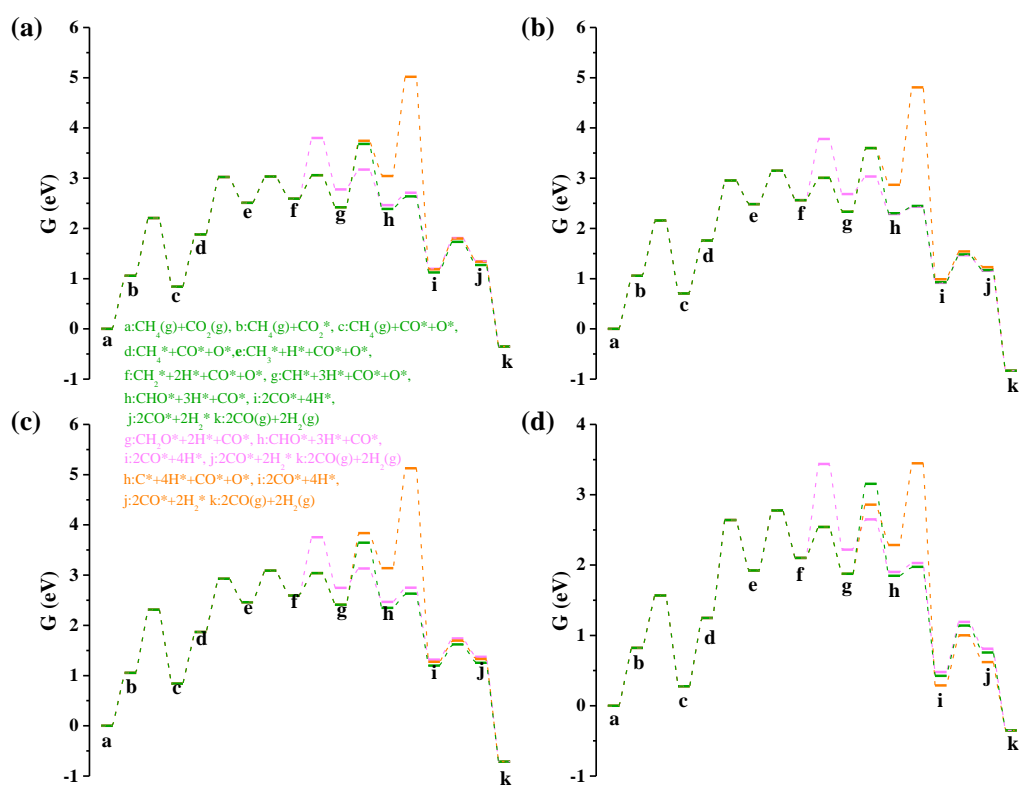

**Figure S9.** Gibbs free energy profiles of CH<sub>2</sub>-O oxidation, CH-O oxidation, and C-O oxidation DRM reaction pathways on Ni(111) under electric fields of (a) 0, (b) -0.6, (c) +0.6 V/Å and (d) K additive at 1073.15 K.

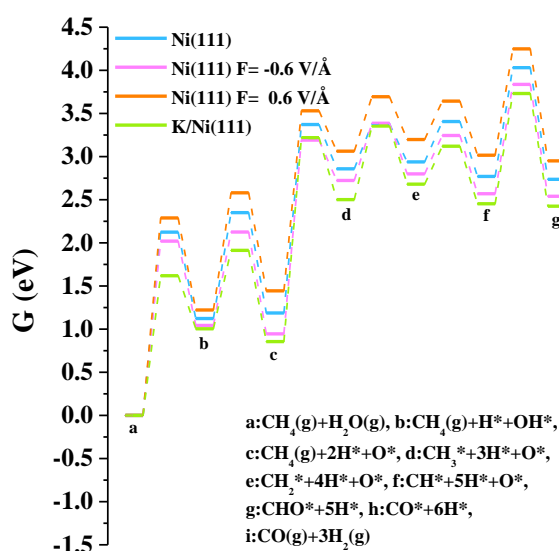

**Figure S10.** Gibbs free energy profiles of the most favorable SRM reaction pathway (CH-O) on Ni(111) under electric fields of 0, -0.6, +0.6 V/Å and K additive at 1073.15 K.

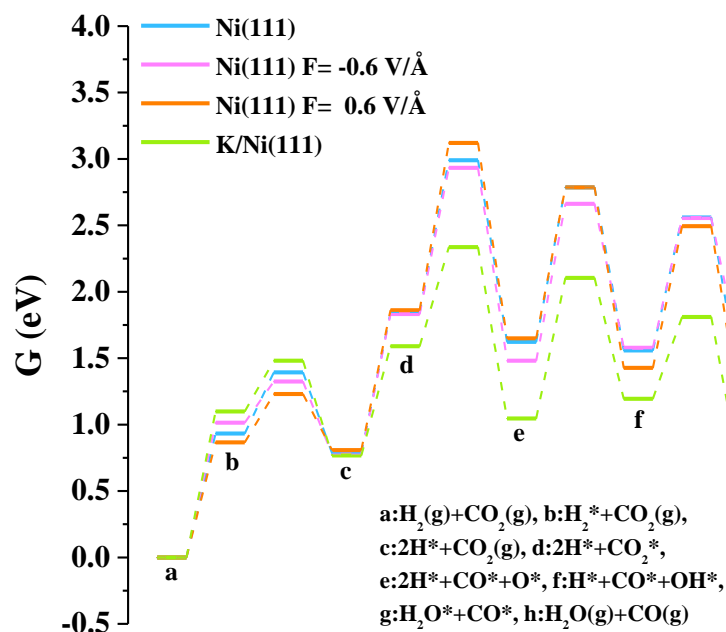

**Figure S11.** Gibbs free energy profiles of RWGS reaction on Ni(111) under electric fields of 0,  $-0.6$ ,  $+0.6$  V/Å and K additive at 1073.15 K.

## References

- 1 M. Zhou and B. Liu, *ChemCatChem*, 2015, **7**, 3928–3935.
- 2 Y.-A. Zhu, D. Chen, X.-G. Zhou and W.-K. Yuan, *Catal. Today*, 2009, **148**, 260–267.
- 3 S.-G. Wang, D.-B. Cao, Y.-W. Li, J. Wang and H. Jiao, *Surf. Sci.*, 2006, **600**, 3226–3234.
- 4 W.-Y. Wang and G.-C. Wang, *J. Phys. Chem. C*, 2021, **125**, 18653–18664.
- 5 F. Che, R. Zhang, A. J. Hensley, S. Ha and J.-S. McEwen, *Phys. Chem. Chem. Phys.*, 2014, **16**, 2399–2410.
- 6 J. Wellendorff, T. L. Silbaugh, D. Garcia-Pintos, J. K. Nørskov, T. Bligaard, F. Studt and C. T. Campbell, *Surf. Sci.*, 2015, **640**, 36–44.
- 7 F. Che, J. T. Gray, S. Ha and J.-S. McEwen, *ACS Catal.*, 2017, **7**, 551–562.
- 8 L. Foppa, M.-C. Silaghi, K. Larmier and A. Comas-Vives, *J. Catal.*, 2016, **343**, 196–207.
